# Supplementary material
Source: PubMed Central journal article supplement (PMC4085767)
Supplement: cr201473x1.pdf [file cr201473x1.pdf]

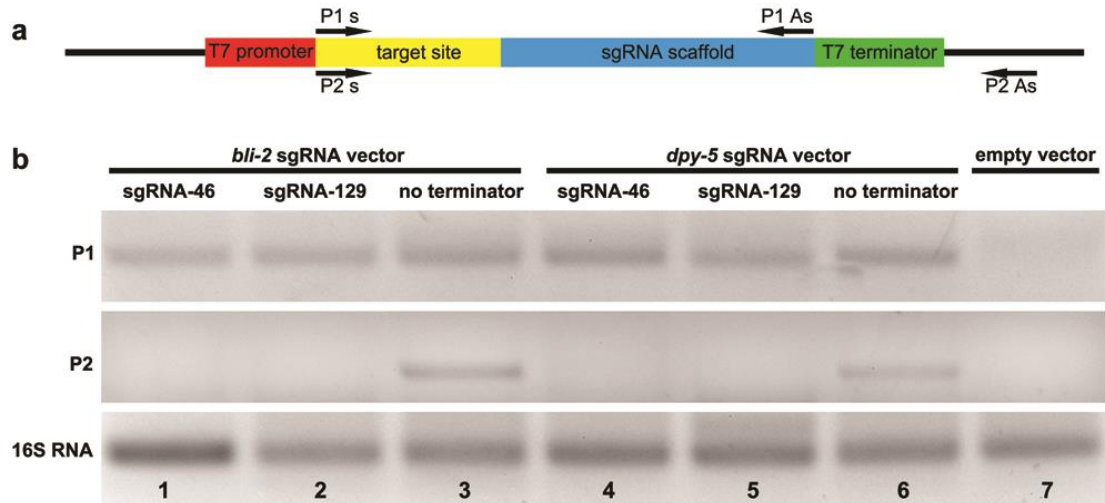

**Figure S1A.** The ts-gRNA encoding plasmids, used for the CRISPR-Cas9 feeding system and, are transcribed normally in bacteria.

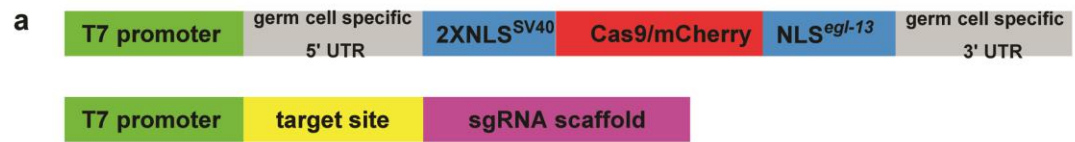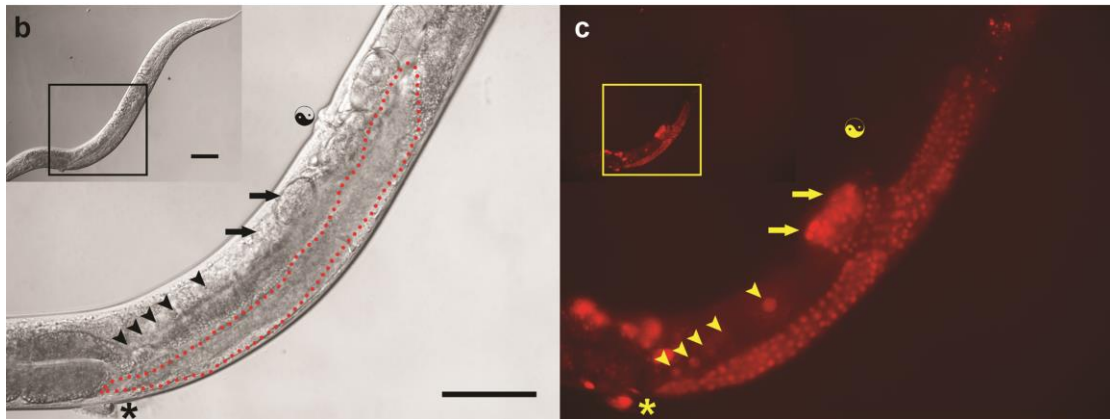

**Figure S1B. Tracing the injected mCherry mRNA in a gonad arm of a hermaphrodite.**

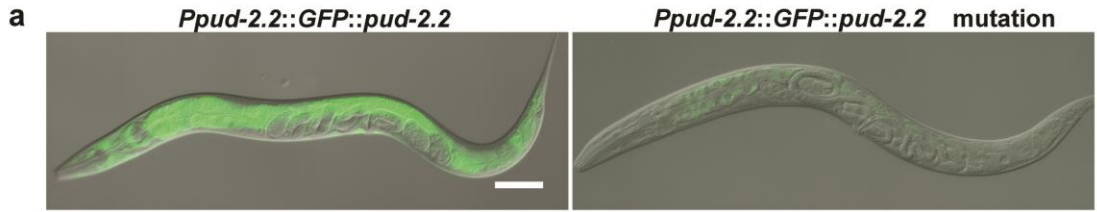

**b** Mutations in *gfp*

|                                                     |           |
|-----------------------------------------------------|-----------|
| <u>GGTGAAGGTGATGCAACATA</u> CGGAAAACCTACCCTTAAATTTA | wild type |
| GGTGAAGGTGATGCAA--TACGGAAAACCTACCCTTAAATTTA         | -2        |
| GGTGAAGGTGATGTC---ATACGGAAAACCTACCCTTAAATTTA        | -3        |
| GGTGAAGGTGATGCAACAT-CGGAAAACCTACCCTTAAATTTA         | -1        |
| GGTGAAGGTGATGCAATcCATAcCGGAAAACCTACCCTTAAATTTA      | +2        |

**c**

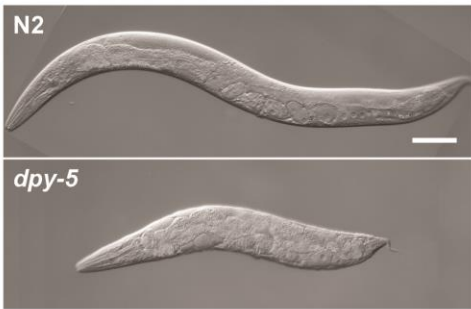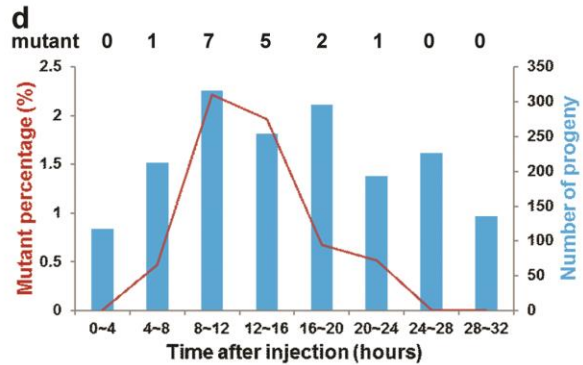

**e** Mutations in *dpy-5*

|                                                      |           |
|------------------------------------------------------|-----------|
| <u>ATCTCAAGGATGCCAGCCGGAGCTCC</u> AGGAAACCCAGGAGCCCC | wild type |
| ATCTCAAGGATGCCAGCCGGAG-TCCAGGAAACCCAGGAGCCCC         | -1        |
| ATCTCAAGGATGCCAGCCGG-CTCCAGGAAACCCAGGAGCCCC          | -2        |
| ATCTCAAGGATGCCAGCCGGAGCaTCCAGGAAACCCAGGAGCCCC        | +1        |
| ATCTCAAGGATGCCAGCCGG-cCTCCAGGAAACCCAGGAGCCCC         | -2(-3,+1) |
| ATCTCAAGGATGCCAGCCGGAGcttagcTCCAGGAAACCCAGGAGCCCC    | +5        |
| ATCTCAAGGATGCCAGCC--CTCCAGGAAACCCAGGAGCCCC           | -4        |
| ATCTCAAGGATGCCAGCCGGA-TCCAGGAAACCCAGGAGCCCC          | -2        |
| ATCTCAAGGATGCCAGCCGGAaaGCTCCAGGAAACCCAGGAGCCCC       | +2        |
| ATCTCAAGGATGCCAGCCGGAGtaggcatgCTCCAGGAAACCCAGGAGCCCC | +8        |
| ATCTCAAGGATGCCAGCCGG-CTCCAGGAAACCCAGGAGCCCC          | -2        |
| ATCTCAAGGATGCCAG--GCTCCAGGAAACCCAGGAGCCCC            | -5        |
| ATCTCAAGGATGCCAGCCGGAG-TCCAGGAAACCCAGGAGCCCC         | -1        |
| ATCTCAAGGATGCCAGCCGG--CCAGGAAACCCAGGAGCCCC           | -4        |
| ATCTCAAGGATGCCCA--aa--CTCCAGGAAACCCAGGAGCCCC         | -5(-7,+2) |
| ATCTCAAGGATGCCAGCCGGAGtagCCAGGAAACCCAGGAGCCCC        | +2        |
| ATCTCAAGGATGCCAGCCGGAGCTAGCaCAGGAAACCCAGGAGCCCC      | +1        |

**Figure S1C. Heritable and targeted mutations obtained via *Cas9* mRNA/gRNA RNA gonad injection.**

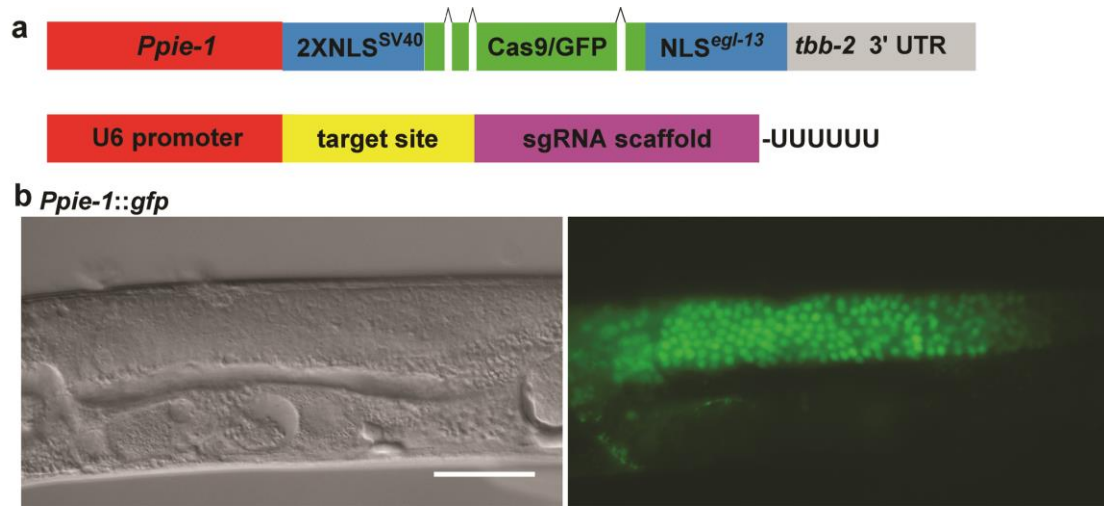

**Figure S1D. Direct gonad injection of Cas9 and gRNA encoding plasmids.**

Mutations in *dpy-5*

|                                                    |           |
|----------------------------------------------------|-----------|
| TCCATCTCAAGGATGCCCGAGCCGGAGCTCCAGGAAACCCAGGAGCCCC  | wild type |
| TCCATCTCAAGGATGCCCGAGCCGGAGC-CCAGGAAACCCAGGAGCCCC  | -1        |
| TCCATCTCAAGGATGCCCGAGCCGGAG--CCAGGAAACCCAGGAGCCCC  | -2        |
| TCCATCTCAAGGATGCCCGAGCCGGAGC--CAGGAAACCCAGGAGCCCC  | -2        |
| TCCATCTCAAGGATGCCCGAGCCGGAG-TCCAGGAAACCCAGGAGCCCC  | -1        |
| TCCATCTCAAGGATGCCCGAGCCG---- TCCAGGAAACCCAGGAGCCCC | -4        |
| TCCATCTCAAGGATGCCCGAGCCGGAGCaTCCAGGAAACCCAGGAGCCCC | +2        |
| TCCATCTCAAGGATGCCCGAGCCGGA-CTCCAGGAAACCCAGGAGCCCC  | -1        |
| TCCATCTCAAGGATGCCCGAGCCGGAGC-CCAGGAAACCCAGGAGCCCC  | -1        |
| TCCATCTCAAGGATGCCCGAGCCGGAGCg-CAGGAAACCCAGGAGCCCC  | -1(-2,+1) |

Figure S1E. Sequences of nine indels of *dpy-5* mutants *via* direct gonad DNA injection.

**Figure S1F. The *dpy-5* and *bli-2* coding sequences and target sites selected for genome editing.**

*dpy-5* (target site) + NGG motif

aaaATGGTAAAGCCGTCGTCGGATTCGGCGCTGCATGCGGAATCTCTGCTATCGTTGCTTGCCTTTGGG  
CTGCACTTGTTCATCACAATGACATCAATGACATGTATGATGATGTGATGGGAGAGCTCGGAGGATTCA  
GAGATATCTCTGATGACACTTGGGGAACCCCTCTCGACGTTTCGTCACGGAGCCGGAGAGTCTGCTGAG  
CAATACGTTCTGGAATCTTCGGACGTCACAAGCGTTCCAACAGCCAATGCTCTTTCGGGACTTCCATCT  
CAAAGGATGCCAGCCGGAGCTCCAGGAAACCCAGGAGCCCCAGGAGAGCCAGGAGGCACTGGACCA  
GACGGAAAGAACGGACCAACTGGACTTCCAGGACTTAACATTCCAATTCCAATGACTTCCCTAAGG  
AGTGCATCAAGTGCCAGCTGGACCACCAGGACAAGATGGACTTCCAGGACAAGAAGGATTCCAAGG  
ACTTCCAGGAGACGCTGGAAAGCGTGGAACCCAGGAAAGGACGGAGAGCCAGGACGTGTTGGAGA  
TATTGGAGATCAAGGAACTCCAGGACAAGACGGACAACCAGGACTTGCTGGACCACCAGGACGCGAT  
GGACTTACCGAAAGGGACAACCAGGAGTCGCTGGACGCCAGGAATGCCAGGACCACGTGGAGAG  
CCAGGAAACAACGGAAATCCAGGAGAGGAAGGACAACTGGAGCCCAGGGACCAACTGGACAGCC  
AGGAAAGGACGGATTCAACGGAAACGACGGAACTCCAGGACAAGCTGGACCACAAGGAGCCGTTGG  
AGCCGATGCCGAATACTGCCATGCCAGAGAGAAAGCGCAGACGCGTCTAAactgttttcgtattcaaaaataatatt  
tatgtattcaa

*bli-2* (target site) + NGG motif

gaattATGGACGAGAAGGAACTGAATCATGAAGCTTCTATGCTTCGAAAGGTTGCATTTCTCGGGATTTCG  
ATCAGCACAGTATCAACTTTAACTTGTATTATCGCTATTCCTCTACTCTACAACATGCAACATGTTCA  
AACCAATTTGCACAGCGAAATGATTTCTGTGTCATAGAACAGTTGGATTGTTTCATTCAATACGAAAG  
AATGCAATCCGCATCAGGAATCAAAGGAAGAAGAATTATTGTAAAGAAACAAGCTGGCTACGATTTCG  
CTGAATCGAATACAAATGCCGAGTCCGGATTCAGTAGCAGCAAATCCTCTTTGGCTCCAGGAGGACAA  
TGCTGTTCTTGCAAAACCGGACCATCTGGACCACCAGGACCACCAGGAGAAGATGGACGGGATGGTA  
GAGATGGAAAACAGGACTTAATGGAGAAGACGGTACAGATGCAAAGGATTCAGCTCCACGACGTGA  
TGCAGCTGCACCATGTTACGATTGCCCTGTAGGGCCACCAGGACCACCAGGAAATATTGGATCAAAGG  
GACAACCAGGAAGAAACGGGAAAGATGGTCTTCCAGGAGTTCCAGGACTACCAGGTCAGCCAGGAG  
AACCAGGAGATGATGGAGAGCCTGGAGAGGATGGAGACCCAGGTCAGCCGGGAGATAACGGAGAGC  
CAGGAAAATGTGATGAAGTGAACGTTGCTCAAGGGCCTCCAGGAAGTCCGGGACCTCCAGGATTACC  
AGGACCTGACGGGCTGCCTGGAACCTCCAGGAAATCCAGGACAAGACGGTGAACAAGGACCAGCAGG  
TGAGCCTGGAAGAGACGGGAAAGATGGTCAACCAGGAAGACCCGGACAGCCAGGACCACCGGGAG  
AACCAGGAACCGGAGGAGGATGTGAACACTGTCCAACACCGAGAAGTGTCTCCAGGATATTAAattgttcatt  
gttataattattggcggaa

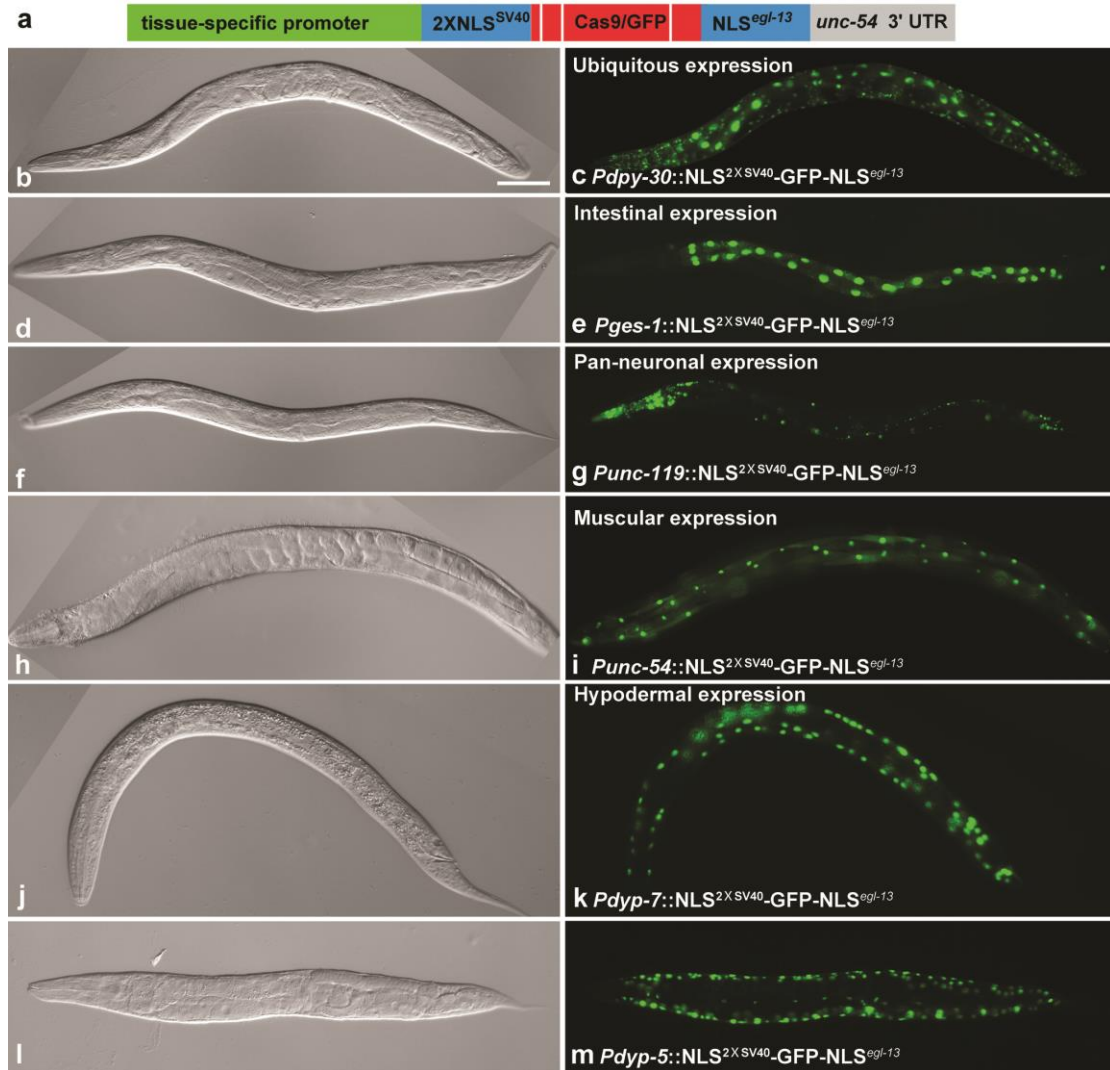

**Figure S1G. The tissue-specific GFP is mainly found in the nuclei of transgenic worm lines.**

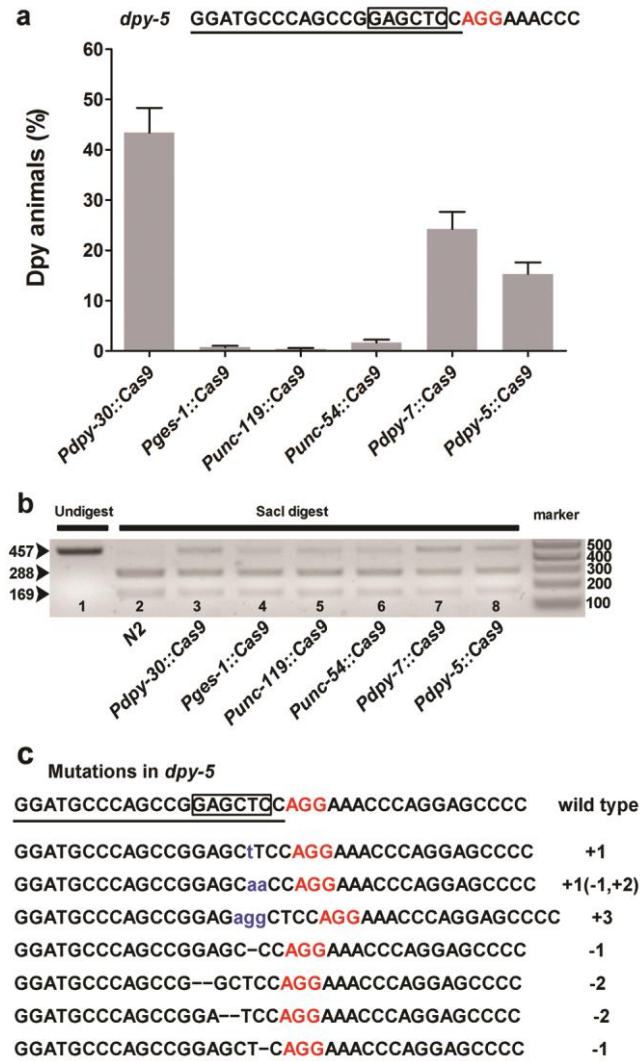

**Figure S1H. Tissue-specific genome editing is achieved by the CRISPR-Cas9 feeding system.**



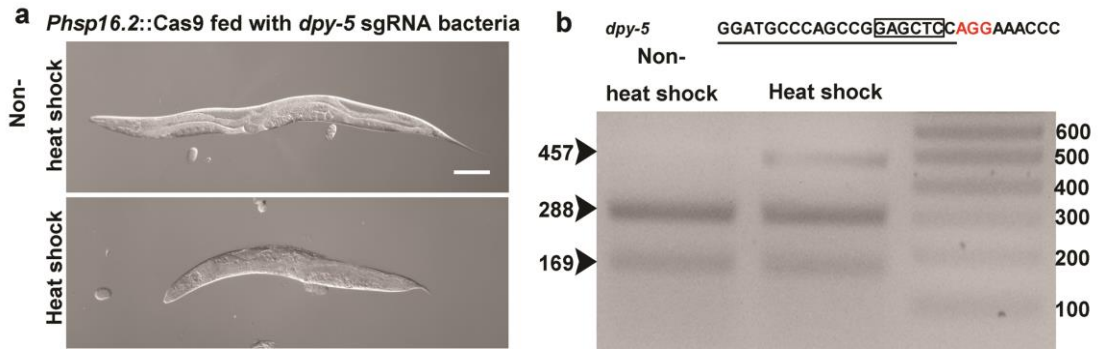

**Figure S11.** Inducible knockout of *dpy-5* is achieved through the CRISPR-Cas9 feeding system.

**Figure S1J. Sequences of Cas9 and gRNA encoding plasmid used in our study**

*T7 promoter-5'UTR<sup>germcell specific</sup>-NLS<sup>2XSV40</sup>-Cas9-NLS<sup>egl-13</sup>-3'UTR<sup>germcell specific</sup>.*

taatacgaactactataggATTAGGTGACACTATAGAATACACGGAATTCTAGATAATCCCCGCGTACCGAGC  
TCAGAAAAAATGACTGCTCCAAAGAAGAAGCGTAAGACTGCTCCAAAGAAGAAGCGTAAGGTACCG  
GTAGAAAAAGACAAGAAGTACTCCATCGGACTCGACATCGGAACCAACTCCGTCGGATGGGCCGTC  
ATCACCGACGAGTACAAGGTCCCATCCAAGAAGTTCAAGGTCTCGGAAACACCGACCGTCACTCCA  
TCAAGAAGAACCTCATCGGAGCCCTCCTCTTCGACTCCGGAGAGACCGCCGAGGCCACCCGTCTCAA  
GCGTACCGCCCGTCGTCGTTACACCCGTCGTAAGAACCGTATCTGCTACCTCCAGGAGATCTTCTCCA  
ACGAGATGGCCAAGGTCGACGACTCCTTCTTCACCGTCTCGAGGAGTCTTCTCGTCGAGGAGGA  
CAAGAAGCACGAGCGTCAACCAATCTTCGAAACATCGTCGACGAGGTGCCTACCACGAGAAGTA  
CCCAACCATCTACCACCTCCGTAAGAAGCTCGTCGACTCCACCGACAAGGCCGACCTCCGTCTCATCT  
ACCTCGCCCTCGCCACATGATCAAGTCCGTGGACACTTCTCATCGAGGGAGACCTCAACCCAGA  
CAACTCCGACGTCGACAAGCTTTCATCCAGCTCGTCCAGACCTACAACCAGCTCTTCGAGGAGAAC  
CCAATCAACGCCTCCGAGTCGACGCCAAGGCCATCCTCTCCGCCGTCCTTCCAAGTCCCGTCGTCT  
CGAGAACCTCATCGCCAGCTCCCAGGAGAGAAGAAGAACGGACTCTTCGAAACCTCATCGCCCTC  
TCCCTCGGACTCACCCAAACTTCAAGTCCAACCTCGACCTCGCCGAGGACGCCAAGCTCCAGCTCTC  
CAAGGACACCTACGACGACGACTCGACAACCTCCTCGCCAGATCGGAGACCAGTACGCCGACCTC  
TTCTCGCCGCCAAGAACCTCTCCGACGCCATCCTCCTCTCCGACATCCTCCGTGTCAACACCGAGAT  
CACCAAGGCCCTCTCCGCCTCCATGATCAAGCGTTACGACGAGCACCACCAGGACCTCACCCCTC  
CTCAAGGCCCTCGTCCGTCAGCAGCTCCAGAGAAGTACAAGGAGATCTTCTTCGACCAGTCCAAGA  
ACGGATACGCCGATACATCGACGGAGGAGCCTCCCAGGAGGAGTTCTACAAGTTCATCAAGCCAA  
TCCTCGAGAAGATGGACGGAACCGAGGAGTCTCTCGTCAAGTCAACCGTGAGGACCTCCTCCGTAA  
GCAGCGTACCTTCGACAACGGATCCATCCCACACCAGATCCACCTCGGAGAGCTCCACGCCATCCTC  
CGTCGTCAGGAGGACTTCTACCCATTCCTCAAGGACAACCGTGAGAAGATCGAGAAGATCCTCACCT  
TCCGTATCCATACTACGTCGGACCACTCGCCCGTGAAACTCCCGTTTCGCCTGGATGACCCGTAAG  
TCCGAGGAGACCATACCCCATGGAACCTTCGAGGAGGTCTCGTCAAGGGAGCCTCCGCCAGTCTC  
TCATCGAGCGTATGACCAACTTCGACAAGAACCTCCAAACGAGAAGGTCTCCAAAGCACTCCCT  
CCTCTACGAGTACTTACCGTCTACAACGAGCTACCAAGGTCAAGTACGTCACCGAGGGAATGCGT  
AAGCCAGCCTTCTCTCCGGAGAGCAGAAGAAGGCCATCGTCGACCTCCTTCAAGACCAACCGTA  
AGGTACCGTCAAGCAGCTCAAGGAGGACTACTTCAAGAAGATCGAGTGCTTCGACTCCGTCGAGAT  
CTCCGGAGTCGAGGACCGTTTCAACGCCTCCCTCGGAACCTACCACGACCTCCTCAAGATCATCAAG  
GACAAGGACTTCTTCGACAACGAGGAGAACGAGGACATCCTCGAGGACATCGTCTCACCCACCC  
TCTTCGAGGACCGTGAGATGATCGAGGAGCGTCTCAAGACCTACGCCACCTTTCGACGACAAGGT  
CATGAAGCAGCTCAAGCGTCGTCGTTACACCGATGGGGACGTCTCTCCCGTAAGTCTATCAACGGA  
ATCCGTGACAAGCAGTCCGAAAGACCATCCTCGACTTCTCAAGTCCGACGGATTCCGCAACCGTA  
ACTTCATGCAGCTCATCCAGCAGACTCCCTCACCTTCAAGGAGGACATCCAGAAGGCCAGGTCTC  
CGGACAGGGAGACTCCCTCCACGAGCACATCGCCAACCTCGCCGATCCCAGCCATCAAGAAGGG  
AATCCTCCAGACCGTCAAGGTCTGTCGACGAGCTCGTCAAGGTCAAGGACGTCACAAGCCAGAGAA  
CATCGTCATCGAGATGGCCCGTGAGAACCAGACCACCCAGAAGGGACAGAAGAAGTCCCGTGAGCG  
TATGAAGCGTATCGAGGAGGGAATCAAGGAGCTCGGATCCCAGATCCTCAAGGAGCACCAGTCTCGA  
GAACACCCAGCTCCAGAACGAGAAGCTTACTCTACTACCTCCAGAACGGACGTGACATGTACGTC  
GACCAGGAGCTCGACATCAACCGTCTCTCCGACTACGACGTCGACCACATCGTCCCACAGTCTTCTC  
CAAGGACGACTCCATCGACAACAAGGTCTCACCCGTTCCGACAAGAACCGTGAAAGTCCGACAA

CGTCCATCCGAGGAGGTCGTC AAGAAGATGAAGA ACTACTGGCGTCAGCTCCTCAACGCCAAGCTC  
ATCACCCAGCGTAAGTTCGACAACCTCACCAAGGCCGAGCGTGGAGGACTCTCCGAGCTCGACAAG  
GCCGGATTCATCAAGCGTCAGCTCGTCGAGACCCGTCAGATCACCAAGCACGTCGCCCAGATCCTCG  
ACTCCCGTATGAACACCAAGTACGACGAGAACGACAAGCTCATCCGTGAGGTCAAGGTCATCACCCCT  
CAAGTCCAAGCTCGTCTCCGACTTCCGTAAGGACTTCCAGTTCTACAAGGTCCGTGAGATCAACAAC  
TACCACCAGCCCCACGACGCCTACCTCAACGCCGTCGTCGGAACCGCCCTCATCAAGAAGTACCCAA  
AGCTCGAGTCCGAGTTCGTCTACGGAGACTACAAGGTCTACGACGTCCGTAAGATGATCGCCAAGTC  
CGAGCAGGAGATCGGAAAAGGCCACCGCCAAGTACTTCTTCTACTCCAACATCATGAACTTCTTCAAG  
ACCGAGATCACCCTCGCCAACGGAGAGATCCGTAAGCGTCCACTCATCGAGACCAACGGAGAGACC  
GGAGAGATCGTCTGGGACAAGGGACGTGACTTCCGCCACCGTCCGTAAGGTCCTCTCCATGCCACAGG  
TCAACATCGTCAAGAAGACCGAGGTCCAGACCGGAGGATTCTCCAAGGAGTCCATCTCCCAAAGCG  
TAACTCCGACAAGCTCATCGCCCGTAAGAAGGACTGGGACCCAAAGAAGTACGGAGGATTCGACTC  
CCCAACCGTCGCCTACTCCGTCTCGTCGTCGCCAAGGTCGAGAAGGGAAAGTCCAAGAAGCTCAAG  
TCCGTCAAGGAGTCTCTCGGAATCACCATCATGGAGCGTTCCTCCTTCGAGAAGAACCCAATCGACT  
TCCTCGAGGCCAAGGGATACAAGGAGGTCAAGAAGGACCTCATCATCAAGTCCCAAAGTACTCCCT  
CTTCGAGCTCGAGAACGGACGTAAGCGTATGCTCGCCTCCGCCGGAGAGCTCCAGAAGGGAAACGA  
GCTCGCCCTCCCATCCAAGTACGTCAACTTCTCTACCTCGCCTCCACTACGAGAAGCTCAAGGGAT  
CCCCAGAGGACAACGAGCAGAAGCAGCTTTCGTGAGCAGCACAAGCACTACCTCGACGAGATCA  
TCGAGCAGATCTCCGAGTTCTCCAAGCGTGTATCTCGCCGACGCCAACCTCGACAAGGTCCTCTCC  
GCCTACAACAAGCACCGTGACAAGCCAATCCGTGAGCAGGCCGAGAACATCATCCACCTCTCACCC  
TCACCAACCTCGGAGCCCCAGCCGCCTTCAAGTACTTCGACACCACCATCGACCGTAAGCGTTACAC  
CTCCACCAAGGAGGTCTTCGACGCCACCCTCATCCACCAGTCCATCACCGGACTCTACGAGACCCGT  
ATCGACCTCTCCAGCTCGGAGGAGAC<sup>gctagc</sup>ATGAGCCGTAGACGAAAAGCGAATCCGACAAAAC  
GAGTGAAAACGCGAAGAAGCTTGCCAAGGAAGTTGAAAATTAAGCCTGAGCTCACGTGACCGGGG  
CCCTGAGATCTGCTGCAG

**Ppie-1:: NLS<sup>2xSV40</sup>-Cas9(introns)-NLS<sup>egl-13</sup>-tbb-2 3'UTR:**

AAAAGTCTATTCTGGGTTCAAAAAGAAATCGAAACGAAAAAATTCGCAACAAGAATCATAGTTTGT  
TCTCTTCGCCTTCAAATACACTCTCACATACAGGTGACGCAGAGGTAACCTGTGATCGGAAGGAATG  
ATGGTAACCTGACTATATTGTGTGTCTGTGTCTCTTCTTTTTTTTTTGTCTGCCTGTATATTTTAC  
ACAGCGCCAATAGACCCAGATCGAGGAGAGAAATCGTTGTTTTGAGAAGGTTTTTTAACATTGAAA  
ATATTAGGAATCGCTGTGAAAACCTGAGGAATTTTCTGCAAAATAGGAGTATTTTATTGAGAAATT  
GATTTGCGGAAGATCTCTAAAAGTTACATAAAATGAAAGTTTTGTGGGGAAATTGTTTTAAAACAC  
GCCTATGGTAATACGAGAACATAAAATCTGAGAATGCGTATTACACAACATATTCGACGCGCAAAA  
TATAACTATATCTCGTAGCGAAAACCTACAGTAATCCTTAAATGACTACTGTAGCGATTGTGTCGATTT  
ACGGGCTCGATTCTCGAAAAAAAATCATTTTTTCAAATTTTGACAGCGATATCAATTTTTCTTCGT  
TTTTTCGTATTTCTCAGTCATTTTTGTGCTTATTTTTAATATTTTATTCAATTAATAAATTAATTTAATTG  
AAAAACGTCCAGACGTATTTTTACATTTCCCGTCTATTTCCGTAATAGGCGGTTAATAACGTAGAAAT  
ACGTCTGTATGAGTTTACTCATCAAAATGACACGAATATTGGACGTTTTTAAATCAAATTAATTTATT  
AATAGGTAAAATATTAATAAATAAACACAAAAATGACAAAAGGAATAGGAAAACACGAAGAGAAAT  
TGAGTATCGCTGTCAAAATTCGAAAACGTGGATTTTTCCAAGAATCGAGCCCGTAAATCGACACAT  
TCGCTACAGTAGTCATTTAAGGATTATTGTAGTTTTTCGCTACGAGATACTTTGCGCGCCAAATATGTT  
GTGAAATACGCATTCTCAGAATTTTATGTTCCCGTAATACCACAATGACCGAATATCATAATAAAAA

AATTCAAAAACAATTTCTAGATTTTATATGATTTTTTGGAAAATTGAAAAAATCTCAGTTTTACCTAA  
TTATATTTGAATTACCGCCAATTGAACTCGTTCGTTGGAGCGCGCTGCATTATTTTCATTAATTAATT  
TTATTAATTTTCATTATTTCACTGATTTTCTTCATTTTTGAGGTTTTTTTTATCGGGAAAATGAAAGAAA  
TATACAAGAAAAATGCAAAATGTTTATTAAAAACTGAAATTAGTATTTCTCGGAGTTTTAGGCATTTT  
CAGTTACTTTTTAATAAAGATTTTGCATTTTTCTTGTATATTTCTTTCATTTTCCGATTAAAAAACCCC  
AAAAATGAAGAAAATCAGTGAAATAATGAAAATTAATTCAAATAACTAATGAAAATAATGCAAGCG  
CGCTCCAACCAACGAGTTC AATTGGCGGTAATTCAAATATAATTAGGTGAAAACCTGAGATTTTTTCA  
ATTTTCAAAAAATCATATAACATCTAGACAATTTTTTTGAAATTTTTTTATCATGATATTCGGTCAATGT  
GTCCCATAGGCATGTTTTAAAGCAATTTCCACCTTTAAATAAAATCGAGAAAAAATGGCGTCAAAA  
GACATATGTAAAAGCTGTTTCTTGTATATTCACACAGAATATAGCCCGATTTTGGAGGTGAAAAA  
CCGGTTTTTTTTGTATTCTTTACGCCACATAAAGTGATATGGAAGAGAAAATCGACATATTTATGFACT  
TGGAGTACGAGTACATTGGAGAAAAAGGGTGAACACTGGA AAAATCTGGGAAATTCAGAAAAAAA  
TTCCGAAAAATCTTTTTGCTGAAAAAAAATTTGTTGCAATTTGGGAAATACTGGAAAATTTTCAT  
CAAAATTAAGCGATTTTTAACGTTTTTGGCTGGGAGATACTATTTGTAATTTTAATGTTTGGTGAGG  
ACAACAGAAATGACCTTCAGCGTACGGAAAACGATTA AAAGACACATTTGAATCGAAAATAGCGTG  
AAAAACATGAAAATATCGGAAAAATAGCTTTAAAATTGGATTTGAAAGCAAAAAATGTATCAAAAA  
TCGAGAAAAATGCTGAAAAAGTTGAAAAACTCAAACAAAAATCAAAAAAGGTTTTTTTTAAAAAT  
CTGTGAGTATCGCAACGAAAGCACAACCTGAGGCATGCGCCTTTAAACCAACCGTAACCAAATTCGG  
AGGCAAAAAAAGATTTCTCGCTGTTTTTTCAGTTTTAAAATCACTTTTCACGTTTCTTTTCGAGTAAT  
TCGTTTGCAAAACATCTGAAAAAATTTTATTTTATAAGAAATTATATAAAAAATCGCTATAAATTGAGT  
TTTTGCCCCAAATTCAGCACGGAGCACTTCTCAATTAATATAATTTTATTTTTTAACATTGAAAGC  
TTTCATAAAATTGAGCTTTGTTTGTAAATAATCAGTGAAAAAACACAGAAATCTTCAAAAAATAAAG  
AAAAAGTTTTTAAAAATCTGTGAGTCCC GCAACGAAAAATAAACTTTAGGCATGCGCCTTTAAACCA  
ACCGTAACCAAATTCGGCGGCAAAAAATGGATTTCTCGCCGTTTTTTTCAGTTTTACAATCACTTTTTAG  
GTTTCTTTTTGCAGTATTTTCGTTTCCCAAACAATTA AAAATCAAATTTTCTTTTCAGATGACTGCTCC  
AAAGAAGAAGCGTAAGACTGCTCCAAAGAAGAAGCGTAAGGTACCGGTAGAAAAAGACAAGAAGT  
ACTCCATCGGACTCGACATCGGAACCAACTCCGTCGGATGGGCCGTCATCACCGACGAGTACAAGGT  
CCCATCCAAGAAGTTCAAGGTCCTCGGAAACACCGACCGTCACTCCATCAAGAAGAACCTCATCGGA  
GCCCTCTCTTCGACTCCGGAGAGACCGCCGAGGCCACCCGTCTCAAGCGTACCGCCCGTCGTCGTT  
ACACCCGTCGTAAGAACCGTATCTGCTACCTCCAGGAGATCTTCTCCAACGAGATGGCCAAGGTGCA  
CGACTCTTCTTCCACCGTCTCGAGGAGTCTTCTCGTCGAGGAGGACAAGAAGCACGAGCGTCAC  
CCAATCTTCGGAAACATCGTCGACGAGGTGCGCTACCACGAGAAGTACCCAACCATCTACCACCTCC  
GTAAGAAGCTCGTCGACTCCACCGACAAGGCCGACCTCCGTCTCATCTACCTCGCCCTCGCCACAT  
GATCAAGTTCCGTGGACACTTCTCATCGAGGGAGACCTCAACCCAGACA ACTCCGACGTGACAAG  
CTTTCATCCAGCTCGTCCAGACCTACAACCAGCTTTCGAGGAGAACCAATCAACGCCTCCGGAG  
TCGACGCCAAGGCCATCTCTCCGCCCCGTCCTCCAAGTCCCGTCGTCTCGAGAACCTCATCGCCCAG  
CTCCCAGGAGAGAAGAAGAACGGACTTTCGAAACCTCATCGCCCTCTCCCTCGGACTCACCCCAA  
ACTTCAAGTCCA ACTTCGACCTCGCCGAGGACGCCAAGCTCCAGCTCTCCAAGGACACCTACGACGA  
CGACCTCGACAACCTCTCGCCAGATCGGAGACCAGTACGCCGACCTTCTCTCGCCGCCAAGAAC  
CTCTCCGACGCCATCTCTCTCCGACATCTCCGTGTCAACACCGAGATCACCAAGGCCCCACTCTC  
CGCTCCATGATCAAGCGTTACGACGAGCACCACAGGACCTACCCTCTCAAGGCCCTCGTCCGT  
CAGCAGCTCCCAGAGGtaagtttaacatatataactaactaacctgattttaaatttcagAAGTACAAGGAGATCTTCTT  
CGACCAGTCCAAGAACGGATACGCCGGATACATCGACGGAGGAGCCTCCCAGGAGGAGTTCTACAA  
GTTTCATCAAGCCAATCTCTCGAGAAGATGGACGGAACCGAGGAGCTCCTCGTCAAGCTCAACCGTGAG

GACCTCTCCGTAAGCAGCGTACCTTCGACAACGGATCCATCCCACACCAGATCCACCTCGGAGAGC  
TCCACGCCATCCTCCGTCGTCAGGAGGACTTCTACCCATTCCTCAAGGACAACCGTGAGAAGATCGA  
GAAGATCCTCACCTTCCGTATCCCATACTACGTCCGACCCTCGCCCGTGAAACTCCCGTTTCGCCT  
GGATGACCCGTAAGTCCGAGGAGACCATACCCCATGGAACCTTCGAGGAGGTCGTCGACAAGGGAG  
CCTCCGCCAGTCCTTCATCGAGCGTATGACCAACTTCGACAAGAACCTCCCAAACGAGAAGGTCCT  
CCCAAAGCACTCCCTCCTCTACGAGTACTTCACCGTCTACAACGAGCTCACCAAGGTCAGTACGTC  
ACCGAGGGAATGCGTAAGCCAGCCTTCTCTCCGGAGAGCAGAAGAAGGCCATCGTCGACCTCCTCT  
TCAAGACCAACCGTAAGGTCACCGTCAAGCAGCTCAAGGAGGACTACTTCAAGAAGATCGAGTGCTT  
CGACTCCGTCGAGATCTCCGGAGTCGAGGACCGTTTCAACGCCTCCCTCGGAACCTACCACGACCTC  
CTCAAGATCATCAAGGACAAGGACTTCTCGACAACGAGGAGAACGAGGACATCCTCGAGGACATC  
GTCTCACCTCACCTCTTCGAGGACCGTGAGATGATCGAGGAGCGTCTCAAGACCTACGCCACC  
TCTTCGACGACAAGGTCATGAAGCAG**gtaagtttaaacagttcggtaactaaccatacatatttaaatctcag**CTCAAGCGT  
CGTCGTTACACCGGATGGGGACGTCTCTCCCGTAAGCTCATCAACGGAATCCGTGACAAGCAGTCCG  
GAAAGACCATCCTCGACTTCTCAAGTCCGACGGATTTCGCAACCGTAACCTCATGCAGCTCATCCA  
CGACGACTCCCTCACCTTCAAGGAGGACATCCAGAAGGCCAGGTCTCCGGACAGGGAGACTCCCTC  
CACGAGCACATCGCCAACCTCGCCGGATCCCAGCCATCAAGAAGGGAATCCTCCAGACCGTCAAG  
GTCGTCGACGAGCTCGTCAAGGTCATGGGACGTCACAAGCCAGAGAACATCGTCATCGAGATGGCCC  
GTGAGAACCAGACCACCCAGAAGGGACAGAAGAACTCCCGTGAGCGTATGAAGCGTATCGAGGAGG  
GAATCAAGGAGCTCGGATCCCAGATCCTCAAGGAGCACCCAGTCGAGAACACCCAGCTCCAGAACG  
AGAAGCTCTACCTTACTACCTCCAGAACCGGACGTGACATGTACGTCGACCAGGAGCTCGACATCAA  
CCGTCTCTCCGACTACGACGTGACCACATCGTCCCACAGTCTTCTCAAGGACGACTCCATCGACA  
ACAAGGTCTCACCCGTTCCGACAAGAACCGTGGAAAGTCCGACAACGTCCCATCCGAGGAGGTCGT  
CAAGAAGATGAAGAACTACTGGCGTCAGCTCCTCAACGCCAAGCTCATCACCCAGCGTAAGTTCGAC  
AACCTCACCAAGGCCGAGCGTGGAGGACTTCCGAGCTCGACAAGGCCGGATTTCATCAAGCGTCAG  
CTCGTCGAGACCCGTCAGATCACCAAGCACGTGCCCCAGATCCTCGACTCCCGTATGAACACCAAGT  
ACGACGAGAACGACAAGCTCATCCGTGAGGTCAGGTCATCACCTCAAGTCCAAGCTCGTCTCCGA  
CTTCCGTAAGGACTTCCAGTTCTACAAGTCCGTGAGATCAACAACCTACCACCAGCCCACGACGCC  
TACCTCAACGCCGTC**gtaagtttaaacatgatttactaactaactaatctgatttaaatctcag**GTCGGAACCGCCCTCATCAA  
GAAGTACCCAAAGCTCGAGTCCGAGTTCTGTCTACGGAGACTACAAGGTCTACGACGTCCGTAAGATG  
ATCGCCAAGTCCGAGCAGGAGATCGGAAAGGCCACCGCCAAGTACTTCTTCTACTCCAACATCATGA  
ACTTCTTCAAGACCGAGATCACCTCGCCAACGGAGAGATCCGTAAGCGTCCACTCATCGAGACCAA  
CGGAGAGACCCGAGAGATCGTCTGGGACAAGGGACGTGACTTCGCCACCGTCCGTAAGGTCTCTCC  
ATGCCACAGGTCAACATCGTCAAGAAGACCGAGGTCCAGACCCGGAGGATTCTCCAAGGAGTCCATC  
CTCCCAAAGCGTAACTCCGACAAGCTCATCGCCCCTAAGAAGGACTGGGACCCAAAGAAGTACGGA  
GGATTTCGACTCCCCAACCGTCGCCTACTCCGTCTCGTCGTCGCAAGGTCGAGAAGGGAAAGTCCA  
AGAAGCTCAAGTCCGTCAAGGAGCTCCTCGGAATCACCATCATGGAGCGTTCCTCCTTCGAGAAGAA  
CCCAATCGACTTCTTCGAGGCCAAGGGATACAAGGAGGTCAAGAAGGACCTCATCATCAAGTCCCA  
AAGTACTCCCTCTTCGAGCTCGAGAACGGACGTAAGCGTATGCTCGCCTCCGCCGGAGAGCTCCAGA  
AGGGAAACGAGCTCGCCCTCCCATCCAAGTACGTCAACTTCTCTACCTCGCCTCCCACTACGAGAA  
GCTCAAGGGATCCCCAGAGGACAACGAGCAGAAGCAGCTCTTCGTCGAGCAGCACAAGCACTACCT  
CGACGAGATCATCGAGCAGATCTCCGAGTTCTCCAAGCGTGTATCCTCGCCGACGCCAACCTCGAC  
AAGTCTCTCCGCCTACAACAAGCACCGTGACAAGCCAATCCGTGAGCAGGCCGAGAACATCATCC  
ACCTCTTACCCCTACCAACCTCGGAGCCCCAGCCGCCTTCAAGTACTTCGACACCACCATCGACCGT  
AAGCGTTACACCTCCACCAAGGAGGTCTCGACGCCACCTCATCCACCAGTCCATCACCGGACTCT

ACGAGACCCGTATCGACCTCTCCCAGCTCGGAGGAGAC<sup>gctagc</sup>ATGAGCCGTAGACGAAAAGCGAAT  
CCGACAAAACCTGAGTGAAAACGCGAAGAAGCTTGCCAAGGAAGTTGAAAATTAAATGCAAGATCCT  
TTCAAGCATTCCCTTCTTCTCTATCACTCTTCTTTTGTCAAAAAATTCTCTCGCTAATTTATTTG  
CTTTTTTAATGTTATTATTTTATGACTTTTTATAGTCACTGAAAAGTTTGCATCTGAGTGAAGTGAATG  
CTATCAAAAATGTGATTCTGTCTGATGTACTTTCACAATCTCTCTTCAATTTCCATTTTGAAGTGCTTTAA  
ACCCGAAAGGTTGAGAAAAATGCGAGCGCTCAAATATTTGTATTGTGTTTCGTTGAGTGACCCAACAA  
AAAGAGGAAACTTTATTGTGCCGCCAA

***U6 promoter-2 ×BbsI enzyme restriction site-gRNA scaffold:***

TCTTCTCCGCTTGCCCTCGAACACGTTTTCCGAAAGCTTTCCTGGATTGAATTGAAAGGAGAAGCTGAG  
GATTACGATACGATCCCTGGAATGAGAGTGAATGGCAGAAATCTAACGAACCTCAGATTTGCTGACG  
ATATTGTGCTTATCGCCAATCATCCGAATACTGCCAGCAAAATGCTCCAAGAACTCGTACAAAAATG  
CTCTGAAGTAGGTCTCGAGATCAATACTGGGAAGACGAAAGTCTTGCGAAACCGATTGCTGACCCC  
AGTAAAGTCTACTTCGGTAGCCCTTCCCCACCACCCAGCTCGACGACGTCGACGAGTACATCTACCT  
CGGTTCGTCAAATCAACGCCCAAAACAACCTTGATGCCGAAATCCACCGAAGACGTCGAGCAGCCTG  
GGCTGCATTCAATGGAATCAAGAATGCCACCGACTCCATCACCGACAAGAAGATTCGTGCGAATCTG  
TTCGACTCAATTGTCCTTCCAGCGCTCACCTACGTTTCAGAAGCCTGGACATTCACCAAAGCTCTATC  
CGAACGAGTACGAATCACACATGCCTCCCCACAAATTATTGATCTACATCCCCATTGGTATAGTGT  
CTTACAGGACTCTCAATATGTCAGCTGCATGATAAATGGTCCCTATATAATTGAATTGCAAATCTAAA  
TGTTTGGGTCTTCGAGAAGACCTGTTTAGAGCTAGAAATAGCAAGTTAAAATAAGGCTAGTCCGTT  
ATCAACTTGAAAAGTGGCACCGAGTCGGTGC

***129-bp T7 RNA polymerase terminator:***

CTGCTAACAAAGCCCGAAAGGAAGCTGAGTTGGCTGCTGCCACCGCTGAGCAATAACTAGCATAACC  
CCTTGGGGCCTCTAACGGGTCTTGAGGGGTTTTTGTGAAAGGAGGAACTATATCCGGAT

***46-bp T7 RNA polymerase terminator:***

TTGCATAACCCCTTGGGGCCTCTAACGGGTCTTGAGGGGTTTTTT

**Supplementary information, Figure S1A. The ts-gRNA encoding plasmids, used for the CRISPR-Cas9 feeding system and, are transcribed normally in bacteria.**

(a) Schematic map of the ts-gRNA, with transcription initiated by T7 RNA polymerase and terminated by the 46-bp/129-bp T7 RNA polymerase terminator. PCR primer pairs, P1s/P1As and P2s/P2As, are used to monitor ts-gRNA transcription states. (b) Confirmation of transcription of the (*dpy-5/bli-2*)ts-gRNA-46 (lane 1 and 4) and (*dpy-5* or *bli-2*)ts-gRNA-129 (lane 2 and 5) in the bacteria by RT-PCR using P1s/P1As and P2s/P2As primers. 16S RNA is an internal control. Vectors without any T7 RNA polymerase terminator (lane 3 and 6) and empty vector (lane 7) serve as positive and negative controls, respectively.

**Supplementary information, Figure S1B. Tracing the injected mCherry mRNA in a gonad arm of a hermaphrodite.**

(a) Schematic diagrams of DNA cassettes used for *in vitro* synthesis of optimized Cas9/mCherry mRNA and ts-gRNA. The Cas9 or mCherry coding region is flanked with two SV40 and one *egl-13* nuclear localization signals (NLSs). Germ cell specific 5' and 3' UTRs are attached to each end. Gene-specific target sequence is cloned into the gRNA vector, respectively. (b) DIC image of one arm of the injected hermaphrodite germline is shown. Dotted red line highlights the germ cells in the gonad. The inlet depicts the entire worm while boxed part indicates the enlarged portion. (c) The dark field of (b) shows where the mCherry fluorescence is. The boxed part in (c) is the corresponding fluorescent image of the boxed part in (b). The arrows represent the developing embryos in the reproductive duct, while the arrowheads represent the developing oocytes. Taiji (☉) indicates vulva. Asterisk marks the injection site. Scale bar, 100  $\mu$ m.

**Supplementary information, Figure S1C. Heritable and targeted mutations obtained via Cas9 mRNA/gRNA RNA gonad injection.**

(a) GFP fluorescence of a transgenic worm, *Ppud-2.2::GFP::pud-2.2*, that carries a single-copy integrated *GFP* (left). The animal on the right carries a disrupted *GFP*, in which the residual signal is the gut auto-fluorescence. (b) Sequences of four indels obtained by direct gonad injecting *Cas9* mRNA and *gfpts*-gRNA. The 20bp *gfp* target site is underlined, and the PAM is outlined in red. Mutations are shown relative to the wild type sequences. Deletions are denoted by dashes, and insertions are depicted in blue lowercases. The nature of the mutations is indicated as the number of base pairs inserted (+) or deleted (-). (c) Control worm (upper) and a *dpy-5* mutant (bottom) obtained by direct gonad injection of *Cas9* mRNA and *dpy-5*ts-gRNA. (d) A time course of the numbers of *dpy-5* mutants obtained after *Cas9* mRNA/*dpy-5*ts-gRNA injection. The left y axis values are percentages of identified mutants per period, and the red curve is plotted as the relative frequency of the entire time period. The x axis represents all tested time periods. The right y axis values are total progeny collected per period (blue histograms). (e) Sequences of 16 indels obtained by direct gonad injecting *Cas9* mRNA and *dpy-5*ts-gRNA. The 20bp *dpy-5* target sequence is

underlined and the PAM is outlined in red. Mutations are shown relative to the wild type sequences. Deletions are denoted by dashes, and insertions are depicted in blue lowercases. The nature of the mutations is indicated as the number of base pairs inserted (+) or deleted (-). In the case of mutant alleles caused by both deletions and insertions, the deleted and inserted numbers are explained in parentheses after the total changed number. Scale bars, 100  $\mu$ m.

**Supplementary information, Figure S1D. Direct gonad injection of Cas9 and gRNA encoding plasmids.**

(a) Diagram of germline-specific *Cas9* and gRNA expression vectors used to generate transgenic lines. Three artificial introns are engineered into *Cas9* coding sequence and the resulted cassette or GFP coding sequence is under control of a germline specific *pie-1* promoter and flanked with two SV40 and an *egl-13* NLSs. The gRNA scaffold is cloned into a modified pMD18-T vector and its expression is under control of the U6 promoter and terminated by a stretch of 6 U residues. (b) Germline expression and nuclear localization of GFP. Scale bar is 100  $\mu$ m.

**Supplementary information, Figure S1E. Sequences of nine indels of *dpy-5* mutants via direct gonad DNA injection.** Mutations are obtained by injecting *Ppie-1::cas9* and *dpy-5ts-gRNA* encoding plasmids. *dpy-5* target sequence is underlined and the PAM is outlined in red. Mutations are shown relative to the wild type sequences. Deletions are denoted by dashes, and insertions are depicted in blue lowercases. The nature of the mutations is indicated as the number of base pairs inserted (+) or deleted (-). In the case of mutant alleles caused by both deletions and insertions, the deleted and inserted numbers are explained in parentheses after the total changed number.

**Supplementary information, Figure S1F. The *dpy-5* and *bli-2* coding sequences and target sites selected for genome editing.**

**Supplementary information, Figure S1G. The tissue-specific GFP is mainly found in the nuclei of transgenic worm lines.**

(a) Diagram of tissue-specific *Cas9* vector used to generate transgenic lines. Three artificial introns are engineered into *Cas9* coding sequence and the resulted cassette or the enhanced-GFP coding sequence is under control of a tissue-specific promoter and flanked with SV40 and *egl-13* NLSs. (b, d, f, h, j, l) DIC images of the *Ptissue-specific::NLS<sup>2xSV40</sup>-GFP-NLS<sup>egl-13</sup>* transgenic animals. (c, e, g, i, k, m) Dark field views of the worms (GFP fluorescence) corresponding to those in left panel. Tissue-specific promoters used in this study are *dpy-30* promoter (c, for the ubiquitous expression), *ges-1* promoter (e, for the intestinal expression), *unc-119* promoter (g, for the pan-neuronal expression), *unc-54* promoter (i, for the muscle expression) and *dpy-7* promoter (k, for hypodermal expression). GFP is observed in nuclei of hypodermal cells in *Pdpy-5::NLS<sup>2xSV40</sup>-GFP-NLS<sup>egl-13</sup>* transgenic animals (m). Scale bar, 100 $\mu$ m.



**Supplementary information, Figure S1H. Tissue-specific genome editing is achieved by the CRISPR-Cas9 feeding system.**

(a) The *dpy-5* specific sequence (underlined) used to construct *dpy-5ts-gRNA* is shown in the top panel. The PAM motif (in red) is immediately adjacent to the underlined portion, and the boxed region is a *SacI* restriction site. The bottom panel shows the penetrance of Dpy phenotype observed in the progeny from each tissue-specific *Cas9* transgenic line fed on *dpy-5ts-gRNA-46* expressing HT115 bacteria. (b) Tissue-specific somatic *dpy-5* mutations are checked by PCR and *SacI* restriction assays. Lanes 1 and 2: undigested and digested PCR products from N2 animals, respectively. Lane 3-8: restriction patterns of PCR products from each tissue-specific *Cas9* transgenic worms fed on *dpy-5ts-gRNA-46* expressing HT115 bacteria. (c) Sequences of seven indels obtained by the CRISPR-Cas9 feeding system. The underlined sequence is target specific (*dpy-5*). The short lines represent *Cas9/gRNA*-led deletions and blue lowercase letters are the insertions. Red capital letters represent the PAM motif. The nature of the mutations is indicated as the number of base pairs inserted (+) or deleted (-). If both deletion and insertion are observed, the fact is described in parentheses.

**Supplementary information, Figure S1I. Inducible knockout of *dpy-5* is achieved through the CRISPR-Cas9 feeding system.**

(a) Transgenic worms, *Phsp-12.6::Cas9*, exert Dpy phenotype if heat shocked (bottom) or appear normal without any heat treatment (upper) after feeding on *dpy-5ts-gRNA* containing bacteria starting at the L1 stage. (b) The *dpy-5* specific sequence (underlined) used to construct *dpy-5ts-gRNA* is shown in the top panel. The PAM motif (in red) is immediately adjacent to the underlined portion, and the boxed region is a *SacI* restriction site. The bottom panel shows the PCR and *SacI* restriction assay results. The left lane: digested PCR product of without heat treatment. The middle lane: a *SacI*-resistant PCR product appears after *Phsp-16.2::Cas9* worm is heat shock. The right panel: molecular marker. Scale bar is 100  $\mu$ m.

**Supplementary information, Figure S1J. Sequences of *Cas9* and gRNA encoding plasmid used in our study**
